# Supplementary material
Source: PubMed Central journal article supplement (PMC2492618)

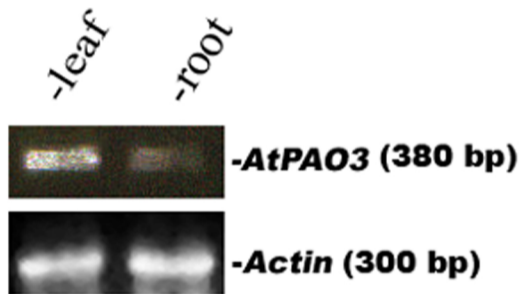

**Supplemental 1.** Expression of *AtPAO3* in leaves and roots. cDNAs were equalized according to actin.

Supplement: pp.108.123802_1.pdf [file pp.108.123802_1.pdf]
